# Supplementary material for: ‘Liquid litmus’: chemosensory pH-responsive photonic ionic liquids
Source: Royal Society of Chemistry journal article supplement (doi:10.1039/c1cc00065a), 2011-01-01
Supplement: c1cc00065a.pdf [file c1cc00065a.pdf]

## SUPPORTING INFORMATION:

### 'Liquid Litmus': Chemosensory pH-Responsive Photonic Ionic Liquids

<sup>5</sup> Ka Yi Yung,<sup>a</sup> Abby J. Schadock-Hewitt,<sup>a</sup> Neil P. Hunter,<sup>a</sup> Frank V. Bright,<sup>\*a</sup> and Gary A. Baker<sup>\*b</sup>

<sup>a</sup> Department of Chemistry, University at Buffalo, The State University of New York, Buffalo, NY 14260-3000, USA. E-mail: chefvb@buffalo.edu

<sup>10</sup> <sup>b</sup> Department of Chemistry, University of Missouri-Columbia, Columbia, MO 65211, USA; E-mail: bakergar@missouri.edu

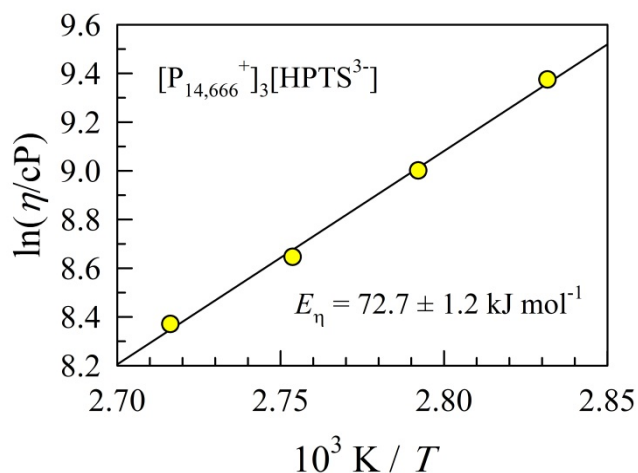

<sup>15</sup> Fig. S1. Arrhenius plot of  $[P_{14,666}^+]_3[HPTS^{3-}]$  for estimation of  $E_\eta$ .

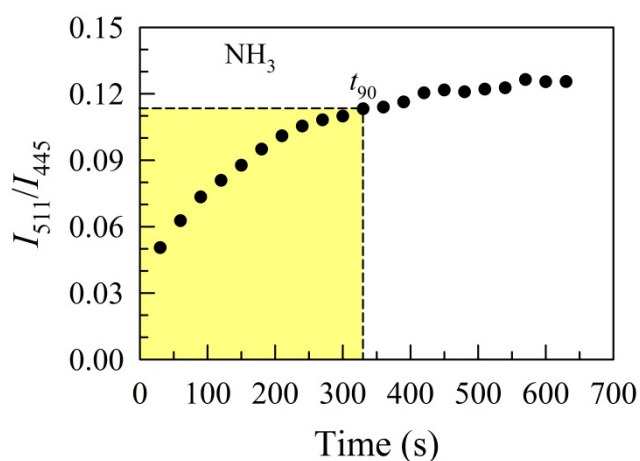

Fig. S2. Typical  $[P_{14,666}^+]_3[HPTS^{3-}]$  response kinetics following exposure to  $\text{NH}_3$ .
